# Supplementary material for: Distinct Microbiota Dysbiosis in Patients with Non-Erosive Reflux Disease and Esophageal Adenocarcinoma
Source: MDPI journal article supplement (doi:10.3390/jcm9072162), 2020-07-08
Supplement: s1 [file s1]

Supplementary Materials:

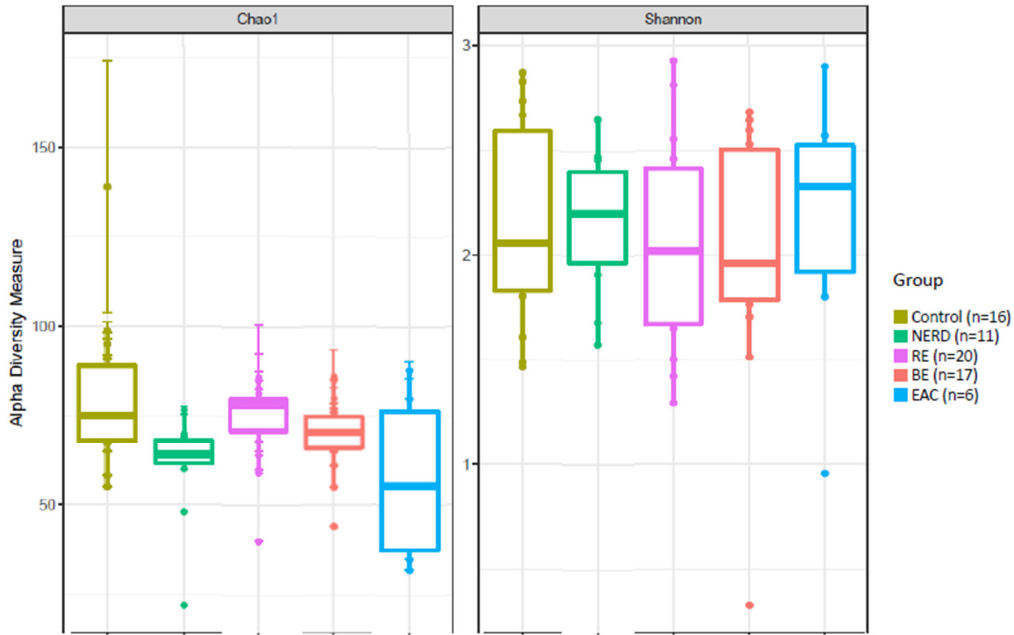

**Figure S1.** Alpha diversity analysis of control, non-erosive reflux disease (NERD), reflux esophagitis (RE), Barrett's esophagus (BE), and esophageal adenocarcinoma (EAC) using Chao1 richness estimator and Shannon diversity index.

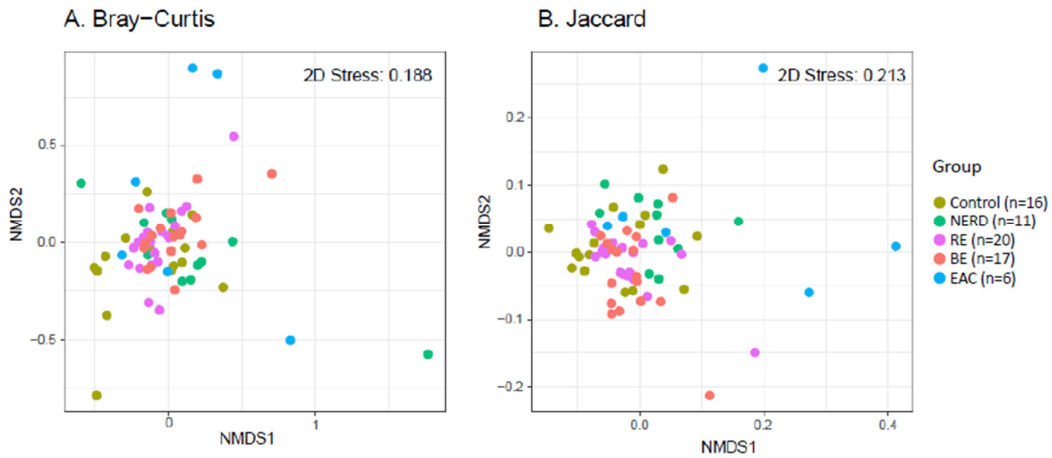

**Figure S2.** Non-metric multi-dimensional scaling (nMDS) plot for Bray-Curtis dissimilarity (abundance and composition) analysis and Jaccard (presence/absence) analysis of control, non-erosive reflux disease (NERD), reflux esophagitis (RE), Barrett's esophagus (BE), and esophageal adenocarcinoma (EAC).

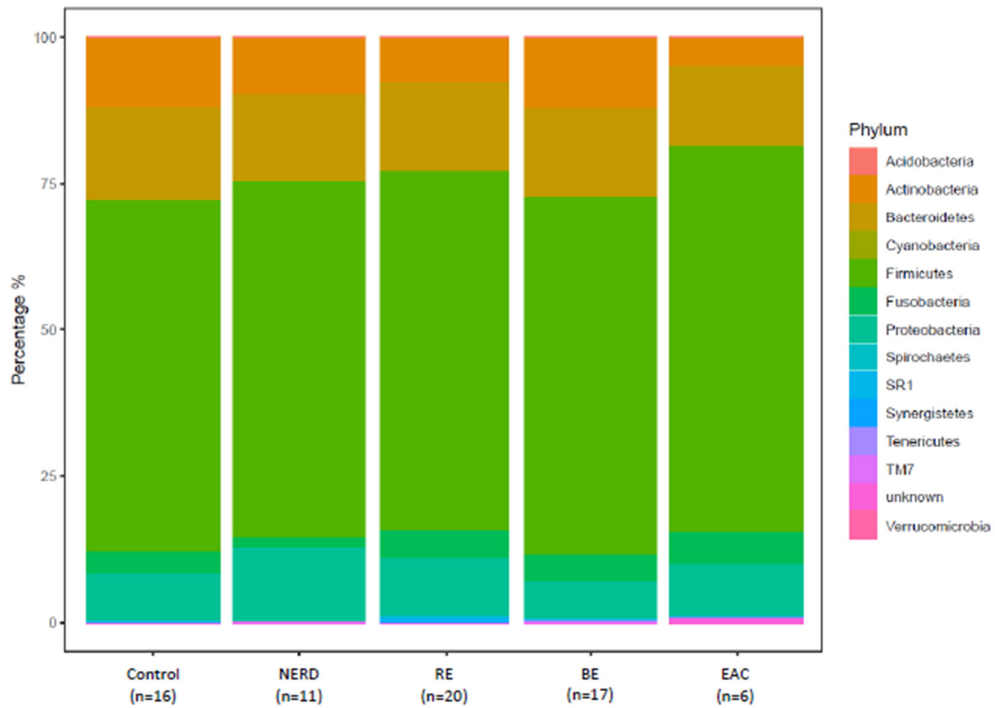

**Figure S3.** Microbiota phylum composition within each group: control, non-erosive reflux disease (NERD), reflux esophagitis (RE), Barrett’s esophagus (BE), and esophageal adenocarcinoma (EAC).

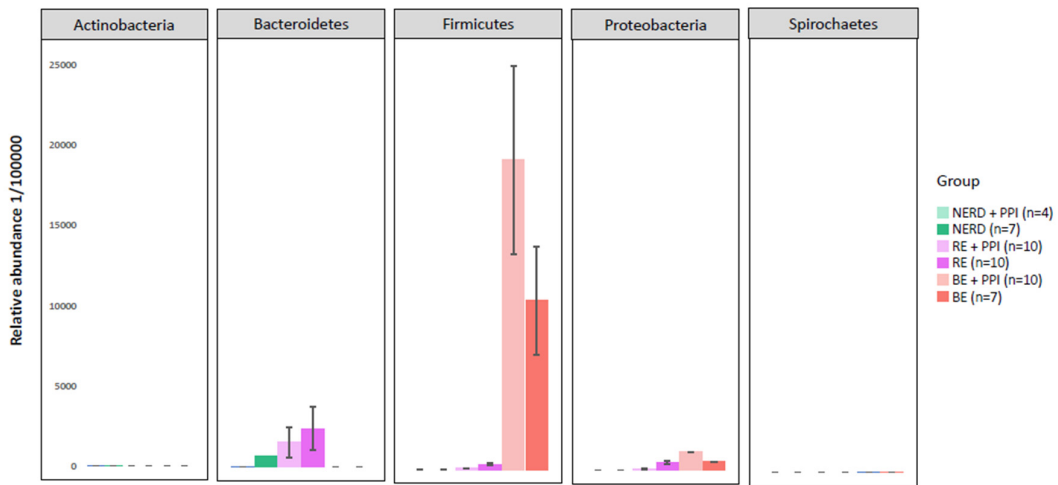

**Figure S4.** Differences in bacterial phylum composition between proton pump inhibitor treatment in non-erosive reflux disease (NERD), reflux esophagitis (RE), and Barrett’s esophagus (BE) disease phenotypes.

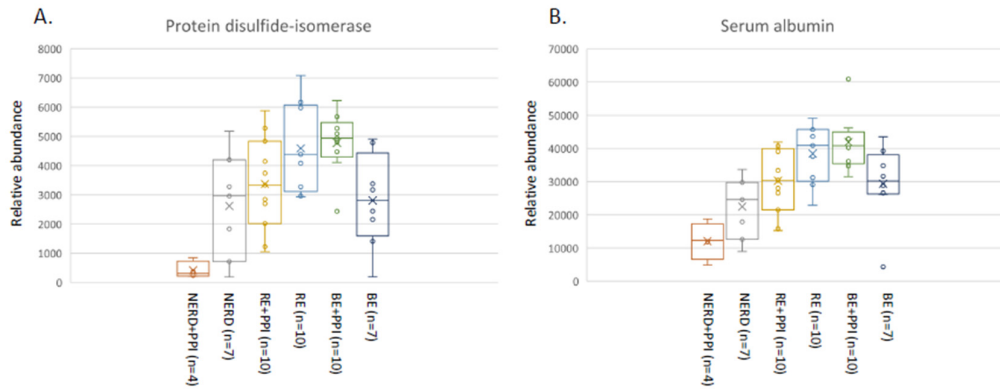

**Figure S5.** (A) protein disulfide isomerase and (B) serum albumin were found differentially expressed between proton pump inhibitor (PPI) treated and untreated mucosal proteomic samples in non-erosive reflux diseases (NERD), reflux esophagitis (RE) and Barrett’s esophagus (BE).
